# Supplementary material for: Solar-powered electrocoagulation for the removal of atrazine with and without microplastics
Source: Royal Society of Chemistry journal article supplement (doi:10.1039/d4ew00809j), 2025-01-01
Supplement: d4ew00809j1.pdf [file d4ew00809j1.pdf]

Solar-Powered Electrocoagulation for the Removal of Atrazine with and without  
Microplastics

Bishwatma Biswas<sup>1</sup>, Anju Joshy<sup>1</sup>, and Sudha Goel<sup>1</sup>

<sup>1</sup>Environmental Engineering and Management, Department of Civil Engineering, IIT  
Kharagpur, West Bengal-721302, India

[Supplementary file](#)

**Table S1** First ( $k_1$ ) and second order ( $k_2$ ) kinetic constants and linear correlation coefficient ( $R^2$ ) values for Al electrode.

| Parameters                               | Range | $k_1$ ( $R^2$ )<br>$10^{-2} \text{ min}^{-1}$ | p-value $10^{-3}$<br>(First order) | $k_2$ ( $R^2$ ) $10^{-2}$<br>L/mg. min | p-value $10^{-3}$<br>(Second order) |
|------------------------------------------|-------|-----------------------------------------------|------------------------------------|----------------------------------------|-------------------------------------|
| Current density<br>(mA/cm <sup>2</sup> ) | 1     | 0.43 (0.86)                                   | 20.82                              | 0.05 (0.87)                            | 18.94                               |
|                                          | 3     | 0.69 (0.90)                                   | 12.2                               | 0.09 (0.92)                            | 8.05                                |
|                                          | 5     | 0.98 (0.95)                                   | 4.69                               | 0.17 (0.95)                            | 3.79                                |
|                                          | 7     | 2.04 (0.92)                                   | 9.65                               | 0.49 (0.87)                            | 18.37                               |
|                                          | 10    | 1.87 (0.92)                                   | 8.58                               | 0.51 (0.89)                            | 15.46                               |
| ATZ concentration<br>(mg/L)              | 3     | 2.29 (0.90)                                   | 12.01                              | 1.90 (0.86)                            | 22.3                                |
|                                          | 5     | 2.20 (0.95)                                   | 4.59                               | 1.20 (0.93)                            | 7.06                                |
|                                          | 10    | 1.90 (0.92)                                   | 8.58                               | 0.51 (0.89)                            | 15.5                                |
|                                          | 15    | 1.65 (0.95)                                   | 4.5                                | 0.24 (0.94)                            | 5.84                                |
|                                          | 20    | 1.80 (0.96)                                   | 3.22                               | 0.20 (0.95)                            | 4.47                                |
| Initial pH                               | 3     | 1.96 (0.92)                                   | 9.07                               | 0.45 (0.89)                            | 14.7                                |
|                                          | 5     | 2.18 (0.93)                                   | 7.53                               | 0.55 (0.90)                            | 13.56                               |
|                                          | 7     | 2.10 (0.93)                                   | 7.32                               | 0.52 (0.90)                            | 13.18                               |
|                                          | 9     | 1.88 (0.93)                                   | 6.59                               | 0.43 (0.91)                            | 10.63                               |
|                                          | 11    | 1.86 (0.93)                                   | 7.65                               | 0.42 (0.90)                            | 13.49                               |
| NaCl concentration<br>(mg/L)             | 100   | 0.41 (0.97)                                   | 1.48                               | 0.05 (0.97)                            | 1.45                                |
|                                          | 200   | 0.52 (0.90)                                   | 1.28                               | 0.07 (0.91)                            | 11.21                               |
|                                          | 300   | 0.81 (0.92)                                   | 8.85                               | 0.12 (0.91)                            | 10.51                               |
|                                          | 400   | 1.20 (0.93)                                   | 6.4                                | 0.22 (0.92)                            | 9.32                                |
|                                          | 500   | 2.10 (0.94)                                   | 5.43                               | 0.51 (0.91)                            | 11.1                                |

**Table S2** First ( $k_1$ ) and second order ( $k_2$ ) kinetic constants and linear correlation coefficient ( $R^2$ ) values for Cu electrode.

| Parameters                               | Range | $k_1$ ( $R^2$ )<br>$10^{-2} \text{ min}^{-1}$ | p-value $10^{-3}$<br>(First order) | $k_2$ ( $R^2$ ) $10^{-2}$<br>L/mg. min | p-value $10^{-3}$<br>(Second order) |
|------------------------------------------|-------|-----------------------------------------------|------------------------------------|----------------------------------------|-------------------------------------|
| Current density<br>(mA/cm <sup>2</sup> ) | 1     | 0.43 (0.97)                                   | 1.31                               | 0.05 (0.98)                            | 0.63                                |
|                                          | 3     | 0.75 (0.98)                                   | 0.65                               | 0.11 (0.98)                            | 1.14                                |
|                                          | 5     | 1.01 (0.95)                                   | 3.45                               | 0.18 (0.96)                            | 2.28                                |
|                                          | 7     | 2.29 (0.94)                                   | 4.84                               | 0.62 (0.91)                            | 10.42                               |
|                                          | 10    | 2.03 (0.92)                                   | 8.64                               | 0.63 (0.88)                            | 16.6                                |
| ATZ concentration<br>(mg/L)              | 3     | 2.39 (0.90)                                   | 12.46                              | 2.07 (0.85)                            | 24.03                               |
|                                          | 5     | 2.30 (0.95)                                   | 4.21                               | 1.34 (0.94)                            | 5.67                                |
|                                          | 10    | 2.10 (0.93)                                   | 6.53                               | 0.67 (0.9)                             | 12.16                               |
|                                          | 15    | 1.70 (0.95)                                   | 4.26                               | 0.26 (0.96)                            | 2.66                                |
|                                          | 20    | 1.79 (0.96)                                   | 2.56                               | 0.20 (0.95)                            | 3.69                                |
| Initial pH                               | 3     | 2.02 (0.93)                                   | 7.62                               | 0.48 (0.90)                            | 12.63                               |
|                                          | 5     | 2.22 (0.93)                                   | 7.97                               | 0.56 (0.89)                            | 14.59                               |
|                                          | 7     | 2.17 (0.92)                                   | 8.84                               | 0.72 (0.88)                            | 17.04                               |
|                                          | 9     | 1.91 (0.93)                                   | 6.72                               | 0.44 (0.91)                            | 10.67                               |
|                                          | 11    | 1.90 (0.93)                                   | 7.12                               | 0.44 (0.90)                            | 12.86                               |
| NaCl concentration<br>(mg/L)             | 100   | 0.45 (0.95)                                   | 3.99                               | 0.06 (0.95)                            | 3.53                                |
|                                          | 200   | 0.60 (0.95)                                   | 4.69                               | 0.09 (0.95)                            | 3.75                                |
|                                          | 300   | 0.91 (0.93)                                   | 7.98                               | 0.15 (0.92)                            | 9.41                                |
|                                          | 400   | 1.30 (0.95)                                   | 4.75                               | 0.25 (0.93)                            | 6.81                                |
|                                          | 500   | 2.30 (0.94)                                   | 4.96                               | 0.62 (0.91)                            | 10.64                               |

**Table S3** Recovery test of the developed HPLC analysis method (n=3).

| <b>Water Matrix</b> | <b>Standard spiked (mg/L)</b> | <b>Found (mg/L)</b> | <b>Recovery (%)</b> | <b>Average recovery (%)</b> |
|---------------------|-------------------------------|---------------------|---------------------|-----------------------------|
| Ground water        | 5                             | 4.59                | 91.95               | 98.75                       |
|                     | 10                            | 10.35               | 103.47              |                             |
|                     | 15                            | 15.13               | 100.84              |                             |
| Lake water          | 5                             | 4.72                | 94.35               | 102.87                      |
|                     | 10                            | 11.09               | 110.89              |                             |
|                     | 15                            | 15.51               | 103.39              |                             |
| River water         | 5                             | 4.974               | 99.44               | 104.25                      |
|                     | 10                            | 11.06               | 110.62              |                             |
|                     | 15                            | 15.40               | 102.69              |                             |
| Wastewater          | 5                             | 4.90                | 98.05               | 101.84                      |
|                     | 10                            | 10.31               | 103.05              |                             |
|                     | 15                            | 15.66               | 104.42              |                             |

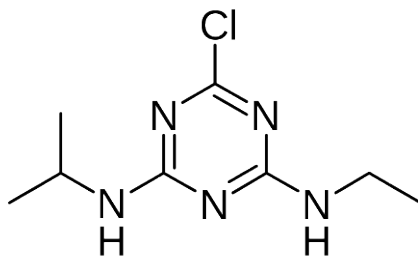

**Fig. S1** Molecular structure of atrazine.

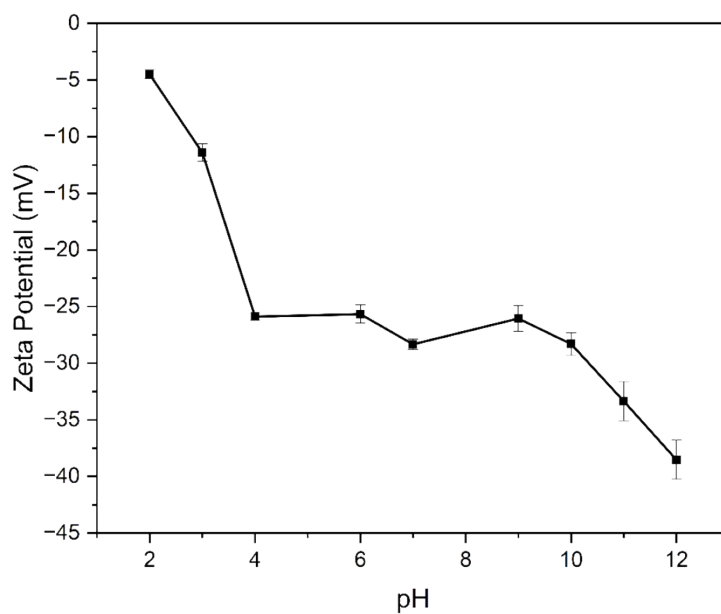

**Fig. S2** Zeta potential of ATZ solution.

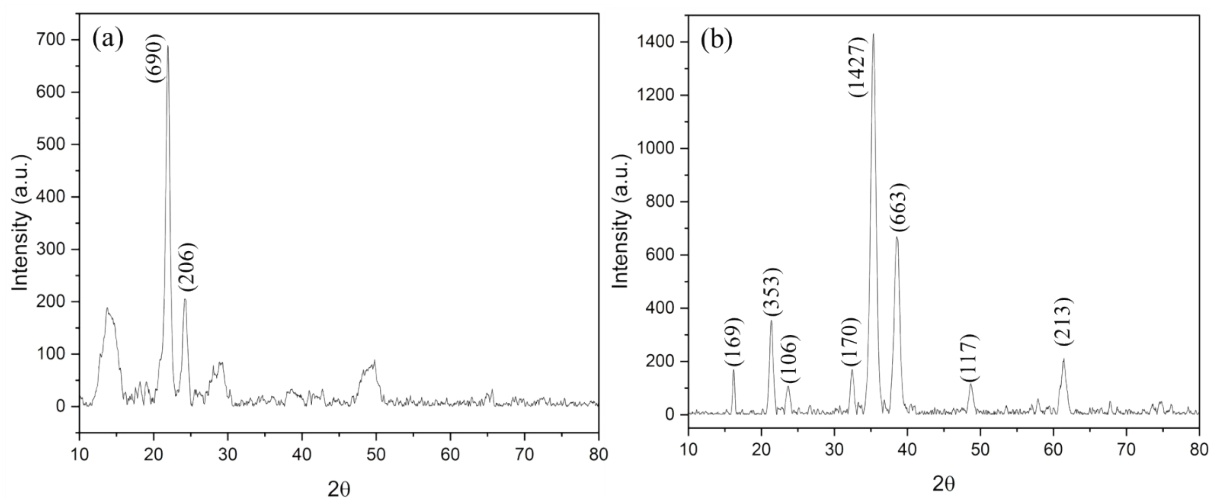

**Fig. S3** XRD spectrum of sludge containing MPs generated from (a) Al-Al electrodes, and (b) Cu-Cu electrodes.
